RESEARCH ARTICLE

# Altered microbiome and metabolome profiling in fearful companion dogs: An exploratory study

Luigi Sacchettino<sup>1\*</sup>, Michele Costanzo<sup>2,3</sup>, Iolanda Veneruso<sup>2,3</sup>, Valeria D'Argenio<sup>3,4</sup>, Maria Mayer<sup>5</sup>, Francesco Napolitano<sup>1,3\*</sup>, Danila d'Angelo<sup>1</sup>

**1** Department of Veterinary Medicine and Animal Production, University of Naples Federico II, Naples, Italy, **2** Department of Molecular Medicine and Medical Biotechnology, University of Naples Federico II, Naples, Italy, **3** CEINGE-Biotecnologie Avanzate Franco Salvatore, Naples, Italy, **4** Department of Human Sciences and Quality of Life Promotion, San Raffaele Open University, Rome, Italy, **5** Independent Researcher, Small Animal Nutrition Consultation (FNOVI), Rome, Italy

\* [Francesco.napolitano3@unina.it](mailto:Francesco.napolitano3@unina.it) (FN); [luigi.sacchettino@unina.it](mailto:luigi.sacchettino@unina.it) (LS)

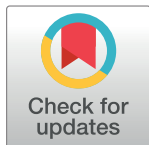

## Abstract

Behavioral dysfunctions in dogs represent one of the main social concerns, since they can endanger animals and human-dog relationship. Together with the trigger stimulus (human, animal, place, scent, auditory stimuli, objects), dogs can experience stressful conditions, either in multiple settings or unique situations, more often turning into generalized fear. Such a dysfunctional behavior can be associated with genetic susceptibility, environmental factors, traumatic experiences, and medical conditions. The available therapy, based on behavior approaches, environmental management, and neurochemical manipulation, through nutrition, supplements, medicines, and pheromones, represent the mainstays of the treatments currently accessible. Growing evidence in humans and animals highlight the importance of the gut-brain axis in the modulation of the brain physiology and behavior as well. Here, taking advantage of the next generation sequencing approach, we sought to investigate the potential connection between gut microbiota and microbiome in dogs suffering from generalized fear ( $n = 8$ ), when compared to healthy subjects ( $n = 8$ ), who all lived in different families. Faecal microbiota evaluation showed a differential abundance of taxa related to Proteobacteria and Firmicutes Phyla, between case and control dogs. Moreover, serum metabolomics documented significant alterations of molecules associated to GABA and glutamate neurotransmission in the patients, as well as bile acids metabolism. Overall, our preliminary and integrated investigations highlighted an intriguing role for the microbiome-metabolome network, allowing to further unveil the potential pathophysiology of relational issues in companion animals and paving the way for more effective therapeutical approaches.

## OPEN ACCESS

**Citation:** Sacchettino L, Costanzo M, Veneruso I, D'Argenio V, Mayer M, Napolitano F, et al. (2025) Altered microbiome and metabolome profiling in fearful companion dogs: An exploratory study. PLoS ONE 20(1): e0315374. <https://doi.org/10.1371/journal.pone.0315374>

**Editor:** Cord M. Brundage, University of Wisconsin-La Crosse, UNITED STATES OF AMERICA

**Received:** August 1, 2024

**Accepted:** November 25, 2024

**Published:** January 15, 2025

**Copyright:** © 2025 Sacchettino et al. This is an open access article distributed under the terms of the [Creative Commons Attribution License](https://creativecommons.org/licenses/by/4.0/), which permits unrestricted use, distribution, and reproduction in any medium, provided the original author and source are credited.

**Data Availability Statement:** All relevant data are within the manuscript and its [Supporting Information](#) files.

**Funding:** The author(s) received no specific funding for this work.

**Competing interests:** The authors have declared that no competing interests exist.

## Introduction

In mammals, the gastrointestinal (GI) tract is populated by a huge variety of symbiotic microorganisms, acquired from maternal microbiota during pregnancy, and influenced by mothers'

diet and delivery methods [1]. Accordingly, studies in 91 pregnant women showed a significant increase of *Enterococcus*, alongside with lower levels of both *Enterobacter* and *Streptococcus* during the early phases of gestation [2]. Moreover, bacteria belonging to Bacteroidetes and Actinobacteria phyla are precociously transmitted to infants through the natural childbirth. On the other hand, caesarean section or antibiotic exposure around birth were found to be causative of a higher incidence in pathogen colonisation and immune-related disorders in children [3]. In general, healthy dogs' microbiomes show more similarities to humans than cats [4], likely due to a shared environment and a relevant starch-enriched diet [5–9]. Firmicutes, Bacteroidetes, Proteobacteria, Fusobacteria, and Actinobacteria phyla build up more than 99% of all intestinal bacteria in dogs [9, 10], while at the genus level, the GI microbiota has been considered dominated by *Fusobacterium*, *Bacteroides*, and *Prevotella* [4, 7, 11]. Studies about GI microbiota and its biogeography in mouse models documented the spatial distribution of specific phyla, which are differentially localized between fore and hindgut, depending on chemical gradients, nutrition availability and intestine immunity [12]. In keeping with that, the stomach harbours an acid resistant flora of aerobic and anaerobic bacteria, populated by *Helicobacter*, *Lactobacillus*, *Streptococcus* and *Clostridium* [13]. On the other hand, facultative aerobic or anaerobic microorganisms, including *Clostridia*, *Lactobacillus* and Proteobacteria inhabit small intestine, whereas the large intestine of both cats and dogs host anaerobic bacteria, such as *Clostridiales*, *Bacteroides*, *Prevotella* and *Fusobacteria* [10, 14, 15]. Research studies about GI microbiota in both humans and animals often do not account for the microbiota diversity within specific sections of the gut, thus representing a generalized profiling of the whole GI tract. In this framework, canine faecal samples could nevertheless provide a proper snapshot of the most relevant gut microbiota taxa composition compared to humans, since they have a more rapid transit time, with a shorter stay within mucosa membranes [16, 17]. In mammals, GI microbiota profiling can be modulated by several factors, such as sex, age, breed, diet, gastrointestinal disease, body condition score (BCS), reproductive status and environment, according to different species [11, 14, 16, 18–24]. Moreover, several pharmacological treatments with pump inhibitors, antidepressants, glucocorticoids, or antibiotics can even have detrimental impact upon mammalian GI microbiota [25–30]. Besides its crucial role in digestion, several reports highlighted the importance of the GI microbiota in integrating endocrine, immune, and neural pathways. In this respect, the bidirectional activity of the gut-brain-immune axis allows the brain to modulate the GI activity, whereas GI tract itself can shape CNS functioning. According to human and veterinary medicine studies, disruption of the gut-brain- axis homeostasis can be associated with the onset and severity of behavioral disorders [31–35]. Such a mutual communication system is exploited by the ability of the microbiota to synthesise specific metabolites and neurotransmitters, which might influence mood-related behaviors, alongside with emotion, motivation, reward and cognition [36–42]. Metabolome is defined as the complete set of low-molecular weight molecules occurring in a peculiar biological system, thus allowing to draw a metabolic fingerprinting that may reflect systemic changes [43, 44]. Hence, the intricate metabolic interactions taking place between gut microorganisms and their hosts might be addressed through the investigation of a metabolome profiling [45]. Indeed, the communication between brain, microbe communities and gut have already been widely assessed as continuous and bidirectional [46]. It is not surprising that irritable bowel syndrome (IBS) and inflammatory bowel disease (IBD) were linked to changes in the microbiota-gut-brain axis [47, 48]. Additionally, these intestinal disorders appeared to be associated with mood impairments, such as anxiety, depression [49]. Therefore, questioning whether the microbiota modulates dog's behavior and vice versa will be helpful. Kirchoff and colleagues (2019) found a clustering of faecal taxa in 21 dogs with aggressive con-specific behavior, thus assuming that gut microbiome profiling might be considered a useful

tool for a diagnostic assessment of aggressive behaviors [50]. Further investigation in a small sample of phobic, aggressive, and anxious dogs showed a different structure and composition of the gut microbiota in dogs with behavioral issues, when compared to healthy controls [51, 52]. Therefore, in the present work we sought to examine the potential impact of GI microbiota, together with a serum metabolomic profiling, in fearful family dogs.

## Methods

### Ethics statement

All experimental protocols were approved by the Scientific Ethic Committee for Animal Experimentation (Reference number: PG/2023/0011527), in accordance with the Italian legislative Decree (N. 26/ 2014). The blood samples were taken during routine visits, as a part of screening for health problems. Written informed consent was obtained from each owner for the publication.

### Animals and sample collection

Fearful (case) dogs and healthy (control) subjects ( $n = 8$ ) were between one and eight years old, clustered for breed, sex, age, and weight (Table 1). Both patients and controls were owned dogs, fed with dry commercial diet containing crude protein (24–28% of total content), fat (11–18%), fiber (2,2–14%), ash (5,8–11%), and moisture (8–9%). All the enrolled subjects lived in different Italian cities, namely Caserta, Naples, Salerno (Campania Region) and Formia (Lazio Region), and did not receive antibiotics four weeks before stool and blood sampling. Neither glucocorticoid, proton pump inhibitors and/or probiotics, herbal remedies and nutraceuticals were provided. One of the behaviorist veterinarians carried out clinical and behavioral examination for each animal, who then categorized according to their behavioral phenotype (fearful vs control group). Diagnostic clues of fear were hypervigilance, scanning, changes in social soliciting behavior (hiding, escape attempts), displacement behaviors, out-of-context grooming and scratching, yawning, lip licking, whining; physiologic signs (trembling, dilated pupils, hypersalivation, tachypnoea, tachycardia). The behavioural history included

**Table 1. Demographics of the dogs enrolled in the study.**

| Subject/Breed           | Group   | Sex    | Age (years) | Reproductive status | Weight (Kg) | BCS (1–9 scale) | City (Region)      |
|-------------------------|---------|--------|-------------|---------------------|-------------|-----------------|--------------------|
| Monky/Mongrel           | Case    | Male   | 2           | Neutered            | 18          | 4               | Caserta (Campania) |
| Mira/Pinscher mix-breed | Control | Female | 3           | Spayed              | 5           | 5               | Caserta (Campania) |
| Cam/Weimaraner          | Control | Male   | 4           | Intact              | 38          | 5               | Salerno (Campania) |
| Macchia/Mongrel         | Case    | Female | 2           | Spayed              | 14          | 4               | Salerno (Campania) |
| Ciammarica/Mongrel      | Case    | Female | 5           | Spayed              | 6           | 4               | Salerno (Campania) |
| Otto/Rottweiler         | Control | Male   | 2.5         | Intact              | 50          | 5               | Salerno (Campania) |
| Rena/Mongrel            | Case    | Female | 1.5         | Spayed              | 30          | 4               | Formia (Lazio)     |
| Charlotte/Mongrel       | Case    | Female | 7           | Spayed              | 7           | 5               | Formia (Lazio)     |
| Maya/Mongrel            | Case    | Female | 2           | Spayed              | 20          | 5               | Formia (Lazio)     |
| Rosina Mongrel          | Case    | Female | 3           | Spayed              | 15          | 4               | Salerno (Campania) |
| Celia/Weimaraner        | Control | Female | 7           | Spayed              | 30          | 5               | Salerno (Campania) |
| Muffin/Mongrel          | Case    | Female | 4           | Spayed              | 19          | 4               | Salerno (Campania) |
| Boris/Shepard mix-breed | Control | Male   | 7           | Intact              | 37          | 5               | Napoli (Campania)  |
| Liam/Hunting mix-breed  | Control | Male   | 5           | Neutered            | 28          | 4               | Napoli (Campania)  |
| Buddy/Mongrel           | Control | Male   | 6           | Intact              | 22          | 4               | Napoli (Campania)  |
| Heidi/Bobtail           | Control | Male   | 7           | Neutered            | 50          | 5               | Napoli (Campania)  |

<https://doi.org/10.1371/journal.pone.0315374.t001>

inadequate early environmental experiences and/or inadequate socialisation. All dogs were subjected to physical examinations by a licensed veterinarian, including recording their body weight and body condition score (using a 9-point scale: underweight (1–3), ideal (4–5), and overweight (6–9)).

The animals underwent a complete blood test, which also included the evaluation of thyroid function, and protein electrophoresis, to rule out any co-morbidities, potentially related to behavioral issues [53, 54]. A small patch of hair was shaved from the dog's neck and topical anaesthesia (Eutectic Mixture of Local Anaesthetics (EMLA™) cream) applied to the area before collection of a 5 ml blood sample from the jugular vein. Blood and stool samples were collected from each animal between 7:00 and 10:00 am, immediately frozen on dry ice, and stored at -80°C until their further processing. A part of stool samples was sent to a laboratory for a coprological examination, aiming at identifying the presence of intestinal parasites, to avoid any potential interference with the gut microbiota. The laboratory parameters assessed in the dogs were all in the ranges. The blood sample was collected during routine veterinary examinations, and as part of canine health screening; therefore, this research was performed without any further suffering or discomfort to the animals. All methods are reported in accordance with Animal Research: Reporting of In Vivo Experiments (ARRIVE) guidelines [55].

### Faecal bacterial community profiling

Genomic DNA was extracted from each collected faecal sample by using the RSC Blood DNA kit and was purified using the Maxwell RSC instrument (both from Promega, Madison, WI, USA). In detail, 100 mg of each sample were treated with 400 µL of lysis buffer and vortexed in order to completely homogenize it. After an incubation at 95°C in a thermomixer for 5 min at 800 rpm and a centrifugation step at 13,000 rpm for 5 min, 300 µL of supernatant were transferred into a new tube. Subsequently, 30 µL of proteinase K were added, the samples were vortexed and incubated at 56°C in thermomixer for 20 min at 500 rpm. Then, the samples are loaded to the RSC cartridge to complete the extraction and eluted in 100 µL of elution buffer. Genomic DNAs concentration and quality were analyzed using a Nanodrop spectrophotometer (Thermo Fisher Scientific, Waltham, MA, USA). Starting from the DNA extraction, two blank/ negative samples were also included as controls and processed together with the dog's samples during each analytical step to check for any potential environmental contamination.

### Illumina amplicon sequencing and bioinformatic analysis

For the microbiome composition analysis, 16S rRNA custom primers able to selectively amplify the V4-V6 hypervariable regions were used. To this end, a first-round PCR was carried out paying attention to optimize PCR mix and amplification conditions in order to avoid non-specific products and/or primer-dimer formation [56, 57]. AmpliTaq Gold polymerase, GC enhancer (both from Thermo Fisher Scientific, Waltham, MA, USA) and 20 µM of forward and reverse custom primers were used. Then, all PCR products were quality analysed through a 2% agarose gel and purified by using AMPure XP beads (Beckman Coulter, Brea, CA, USA). After a quality-check analysis on the Tape Station System with the D1000 ScreenTapes (both from Agilent Technologies, Santa Clara, CA, USA), the purified amplicons were quantified with Qubit HS (Qubit, dsDNA HS Assay, Life Technologies, Carlsbad, CA, USA) and diluted to 2 ng/µL to be further processed for the second-round PCR. During this step, Nextera DNA CD Indexes (Illumina, San Diego, CA, USA) were used to specifically tag each sample, and also to add the universal adapters for the following NGS reactions. Next, further AMPure XP beads-based purification and Tape Station qualitative analysis were carried out. Finally, each sample, together with the six negative controls, were quantified with the Qubit fluorometer

(Life Technologies) and diluted at 4 nM. Five  $\mu\text{L}$  of each diluted library and 5  $\mu\text{L}$  of each negative control were pooled at equimolar concentrations. MiSeq reagent Kit V2.5 500 cycles (250X2) on the MiSeq instrument (Illumina, San Diego, CA, USA) was used for the sequencing reaction. The library's pool was loaded at a final concentration of 9 pM with a 30% PhiX.

The FASTQ files produced by the sequencing run were subsequently analyzed by the CEINGE—Biotecnologie Avanzate Franco Salvatore Bioinformatic Facility (Naples, Italy). A first quality check analysis was conducted by using FastQC software. Next, the alignment against the reference database SILVA NR 99 v.138 enabled to the correct assignment of the OTUs (Operational Taxonomic Units). The obtained OTU and taxonomy tables were used as input files for the web-based tool Microbiome Analyst (version 2.0, last accession September 2023), that allowed for the deeper analysis of the bacterial community composition [58]. In particular,  $\alpha$  diversity was evaluated applying different metrics to assess both richness and evenness; the ANOVA test was applied to verify statistically significant differences. Unweighted and weighted UniFrac distance measures were also analyzed by using the PERMANOVA test to highlight significant differences in the  $\beta$  diversity. Differential abundance analysis was performed using a univariate statistical test based on the EdgeR algorithm; p-values were adjusted using the FDR method [58].

Raw 16S rRNA sequence data were submitted to Sequence Read Archive (SRA) under BioProject accession number ID #PRJNA1181839.

### Serum metabolome analysis

Metabolites were identified and quantified from collected dogs' blood serum by liquid chromatography-tandem mass spectrometry (LC-MS/MS), using a targeted metabolomics approach [59]. In detail, 10  $\mu\text{L}$  of serum were transferred onto a 96-well plate containing the positions for blanks, phosphate buffer saline (PBS), calibrants, and quality controls (QC) according to the protocols of MxP<sup>®</sup> Quant 500 kit (Biocrates Life Sciences AG, Innsbruck, Austria) [60]. The mixtures were dried under  $\text{N}_2$ , incubated for 1 h in 5% phenyl isothiocyanate (PITC) and then added with 5 mM ammonium acetate in methanol to finally extract metabolites by plate centrifugation. LC-MS/MS analysis of metabolomes was carried out in multiple reaction monitoring (MRM) mode using a Triple Quad 5500+ QTRAP<sup>®</sup> Ready (AB Sciex, Framingham, MA, USA) coupled to a 1260 Infinity II HPLC (Agilent, Santa Clara, CA, USA). Each sample was run by LC-MS/MS-MRM three times as technical replicates. Raw MS data were processed with the Analyst software v.1.7.1 (AB Sciex) and the MetIDQ<sup>TM</sup> Oxygen software (Biocrates Life Sciences AG) to integrate targeted metabolite peaks for accurate quantification with respect to labelled internal standards, and finally expressed as  $\mu\text{M}$ . The metabolomic analysis allowed to target 106 small molecules, including amino acids (AA) and related AA, bile acids, fatty acids, biogenic amines, carboxylic acids, hormones, indoles derivatives, alkaloids, amine oxides, cresols, vitamins, and cofactors.

The metabolomic dataset was first processed using the MetaboAnalyst 5.0 tool for chemometrics and statistical analyses [61, 62]. The features with more than 50% of missing values were removed, and missing values were imputed using 1/5 of minimum positive values of their corresponding variables. The dataset was normalized, log10-transformed and auto-scaled. Partial Least Squares-Discriminant Analysis (PLS-DA) was performed to find the variance between the (case and control) groups and predict the class of relevant features according to the VIP (Variable Importance in Projection) score. Metabolites with VIP score > 1.5 were selected as predictive of the phenotypes analyzed. Hierarchical clustering analysis and heatmap visualization were performed to check intra- and inter-group biological variability according to the relative abundance of their metabolite features. The technical triplicates of each sample



were kept as individual features (not averaged) for PLS-DA and heatmap clustering also to assess the reproducibility of metabolomics data. MetaboAnalyst was also used for pathway analysis and Metabolite Set Enrichment Analysis (MSEA) through the Over Representation Analysis (ORA) function [63]. For pathway enrichment analysis, the Homo sapiens KEGG was chosen as pathway library in absence of a proper database relative to dog species; matched pathways were selected according to the p-values from the pathway enrichment analysis and pathway impact values from the pathway topology analysis (i.e. the selected pathway showed concurrently  $-\log(p) > 1.3$  and pathway impact  $> 0.1$ ). For the enrichment of ORA terms, significant terms were selected for values of  $p < 0.05$ .

## Metabolome data

The normalized dataset was exported from MetaboAnalyst to execute univariate statistical analysis within GraphPad Prism 9.0 software [64]. In particular, volcano plot analysis was carried out to select metabolites with significantly changing abundance. Individual log<sub>2</sub> abundance values were averaged within each group, and the fold change was calculated as difference of the metabolite levels in fearful and control dogs.

The significance threshold was set at  $p < 0.01$ . On the other hand, the significant differences for binary comparisons (between cases and controls) were evaluated for the single molecules, i.e. those significant from volcano plot analysis, using the non-normalized concentration ( $\mu\text{M}$ ) dataset obtained by LC-MS/MS. Parametric Welch's t-test or non-parametric Mann-Whitney t-test were used as statistical tests according to the normality of the distributions, assessed by D'Agostino & Pearson test. Finally, correlation analysis between significant microbiota species and metabolites was performed computing Spearman correlation and simple linear regression.

Metabolomics data have been deposited to the EMBL-EBI MetaboLights database (DOI: [10.1093/nar/gkad1045](https://doi.org/10.1093/nar/gkad1045), PMID:37971328) with the identifier MTBLS11669.

## Results

The sequencing reaction produced a total yield of 6.9 Gb, a cluster passing filter of 93.9% and a cluster density of 697 K/mm<sup>2</sup>. All the reads detected in at least one of the six negative controls were filtered out and eliminated from the rest of the samples in a normalization- process. At the end of this decontamination step, an average of 235,827 reads/sample, corresponding to a total of 706 OTUs, was obtained and used for subsequent analyses. First, microbial communities' diversity measures were assessed. In particular, to verify both the richness and the evenness, alpha diversity was evaluated within two groups, and the ANOVA test was applied to highlight any significant difference. As shown in Fig 1, all the different metrics used (panel A: Observed Species, panel B: Chao1, and panel C: Shannon) showed no significant differences between groups. However, a different trend could be appreciable, richness and evenness being both higher in the case than in the control group. In addition, beta diversity analysis was carried out by using both unweighted (Fig 1D) and weighted (Fig 1E) Unifrac distance measures, and no significant differences were found.

Although the diversity measures showed no significant differences between the two tested conditions, it can be noticed that the case group showed a reduced heterogeneity compared to the control, suggesting that the disease status may be related to common microbial features. Next, taxonomy assignment allowed to identify six phyla, four of which with an abundance  $> 1\%$  in at least one of the 2 compared groups (Fig 2A). Among these, we found a lower relative abundance of Proteobacteria in the case vs control group (3.5% vs 20.9%), while Fusobacteriota (44.9% vs 52.7%), Firmicutes (32.9% vs 40%), and Actinobacteriota (0.8% vs 3.3%) phyla were more abundant. Accordingly, the core microbiome analysis, considering a relative

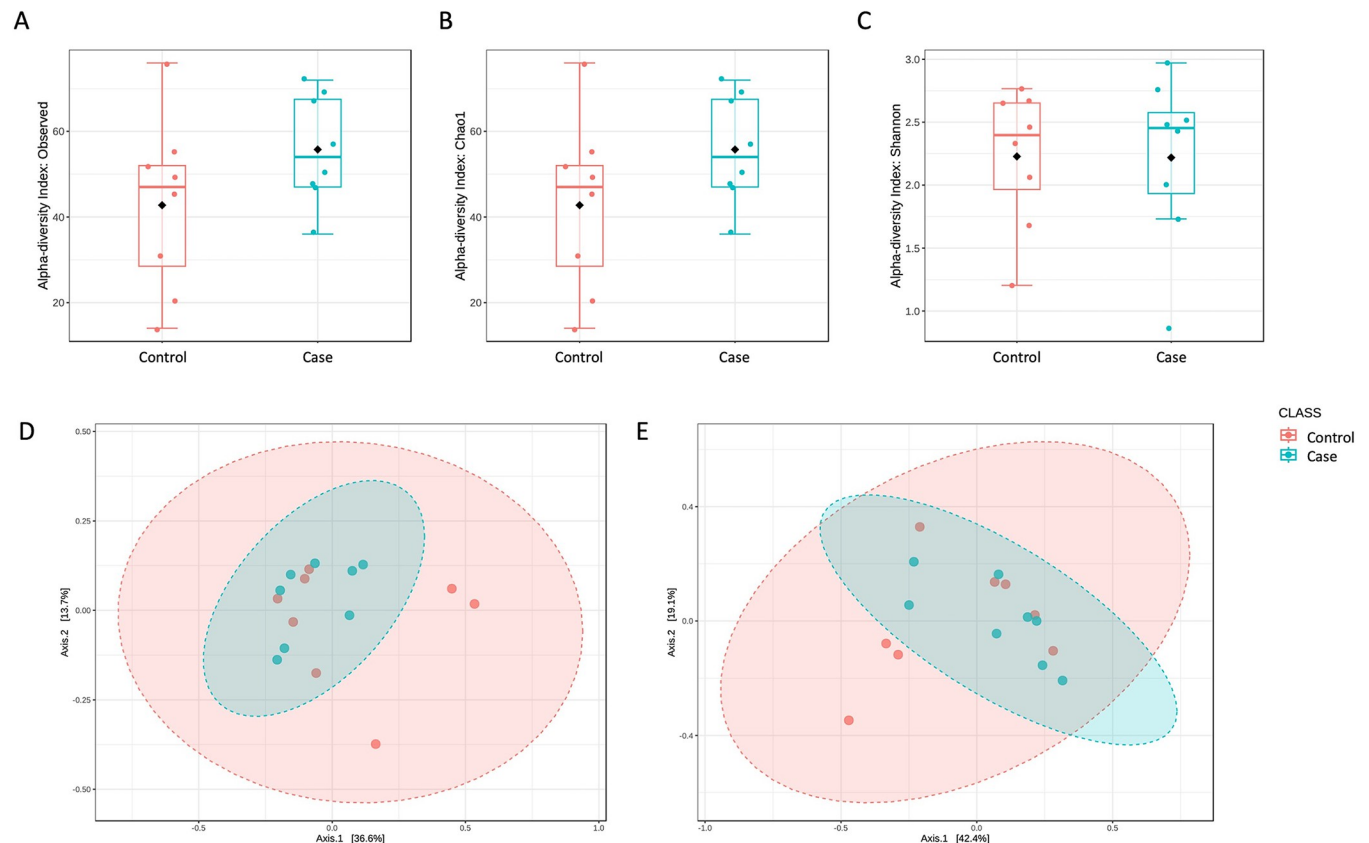

**Fig 1. Diversity measures between the fearful dogs (case) and the dogs with normal behavior (control).** Alpha diversity was assessed by using Observed species ((A),  $p = 0.14$ ), Chao1 ((B),  $p = 0.14$ ) and Shannon ((C),  $p = 0.97$ ), indices and the ANOVA test. B diversity was also evaluated by using the unweighted ((D),  $p < 0.52$ ) and weighted ((E),  $p < 0.2$ ) UniFrac distance measures, applying the PERMANOVA test. No significant differences were identified by all the above-mentioned tests.

<https://doi.org/10.1371/journal.pone.0315374.g001>

abundance  $> 1\%$  and a 20% value of sample prevalence, showed a different set of taxa characterizing the case (Fig 2B) and the control group (Fig 2C). At genus level, out of nine most represented taxa, we found six bacteria highly expressed in the case vs control group, namely *Cetobacterium* (10.6% vs 3.44%), *Escherichia\_Shigella* (from 15.9% to 1.6%), *Lachnospirillum* (from 7.6% to 4%), *Phascolarctobacterium* (3.7% vs 2.2%), *Ruminococcus\_gnavus\_group* (4.4% vs 2.5%), and *Sutterella* (4.7% vs 1.7%). On the other hand, *Fusobacterium*, *Holdemanella* and *Megamonas* were found at lower levels in the case group (*Fusobacterium*, 34.4% vs 49.2%; *Holdemanella*, 0.4% vs 4.2%; *Megamonas*, 1.4% vs 4.2%) (Fig 2D).

Then, to verify if these differences are statistically significant we performed a differential abundance analysis. In particular, EdgeR analysis allowed us to identify a lower abundance of *Gammaproteobacteria* and *Dorea* in fearful patients (Fig 3A and 3B), who also displayed higher levels of *Erysipelatoclostridiaceae* and *Peptostreptococcales Tissierellales* (Fig 3C and 3D), when compared to the healthy controls.

To further investigate the systemic changes affecting fearful dogs, a metabolome analysis was performed on the blood serum samples, using a targeted LC-MS/MS approach. The quantitative metabolomics dataset was included in S1 File. Univariate and multivariate statistical analyses were employed to select the most significant metabolic alterations in fearful animals. Specifically, the variances between case compared to control group revealed a good spatial separation according to the PLS-DA, with variances of principal component 1 (PC1) and 2 (PC2)

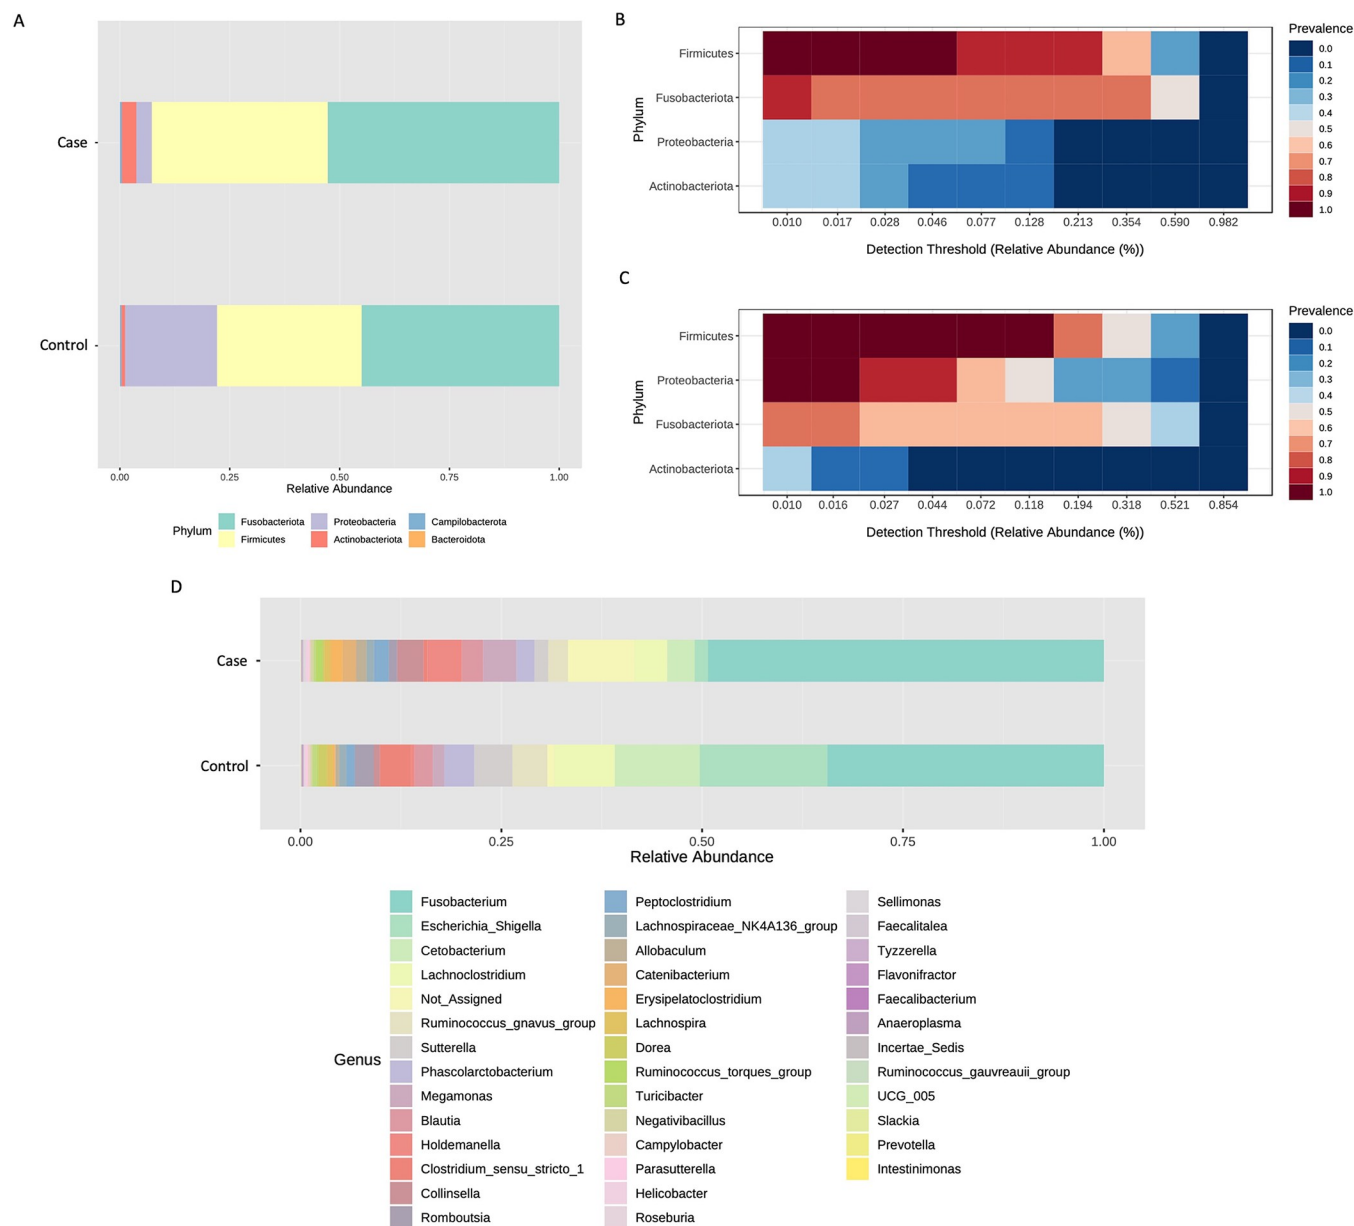

**Fig 2. Taxonomic assignment highlighted different microbial taxa in case and control groups.** A different bacterial composition (relative abundance, %) was highlighted at the phylum level (A) and confirmed by core microbiome analysis showing a different taxa profile in Case (B) and Control (C) groups. These differences in taxa composition were also identified at the genus level, as shown in panel (D).

<https://doi.org/10.1371/journal.pone.0315374.g002>

of 6.2% and 5.1% (Fig 4A). The Variable Importance in Projection (VIP) score was used to identify those metabolites (VIP > 1.5), taurodeoxycholic acid (TDCA) and glutamine (Gln) as examples, whose levels can strongly discriminate fearful dogs versus controls, highlighting metabolic abnormalities likely connected with the fearful phenotype (Fig 4B). Also, the hierarchical clustering of quantified metabolites reported in the heatmap displayed a distinct separation pattern between cases and controls (Fig 4C). Univariate statistics performed by volcano plot analysis highlighted eleven metabolites with differential abundance in fearful dogs (Fig 4D), many of which overlap with VIP metabolites.



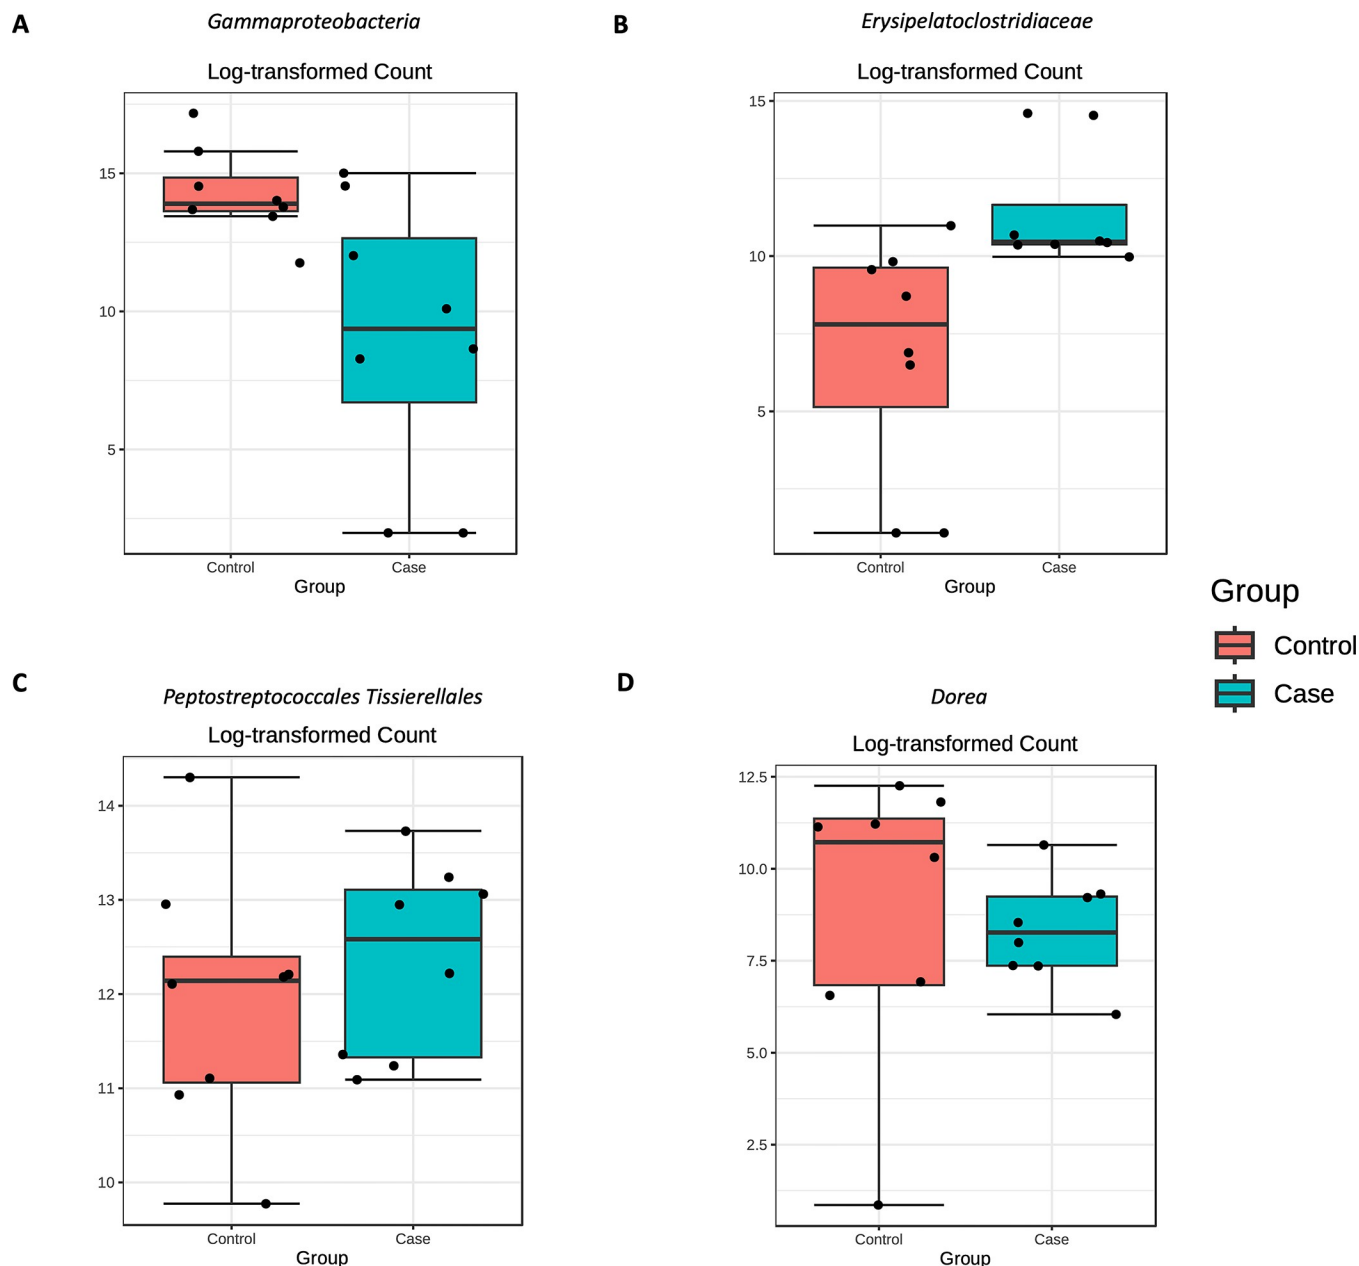

**Fig 3. Significantly different taxa identified between case and control groups by EdgeR analysis (adjusted p-value <0.05).** Among the significantly different taxa we found that the *Gammaproteobacteria* class was less abundant in the cases respect to the controls (A). The Firmicutes-related taxa, *Erysipelatoclostridiaceae* family (B) and *Peptostreptococcales Tissierellales* order (C) were more abundant in the cases, when compared the controls. At genus level, the Firmicutes-belonging *Dorea* taxon was reduced in the case group (D).

<https://doi.org/10.1371/journal.pone.0315374.g003>

Quantitatively altered metabolites are listed in Table 2 in the order from the least abundant to the most abundant, along with their corresponding P-value,  $-\log_{10}(P\text{-value})$ , difference, standard error (SE) of difference, and regulation trend.

To further validate the abundance trends in each sample group for the selected metabolites, we analyzed them individually using raw concentrations from the LC-MS/MS dataset, confirming the trends of regulation and statistical significance (Fig 5A). Additionally, we performed pathway analysis on significant metabolites to enrich dysregulated pathways associated

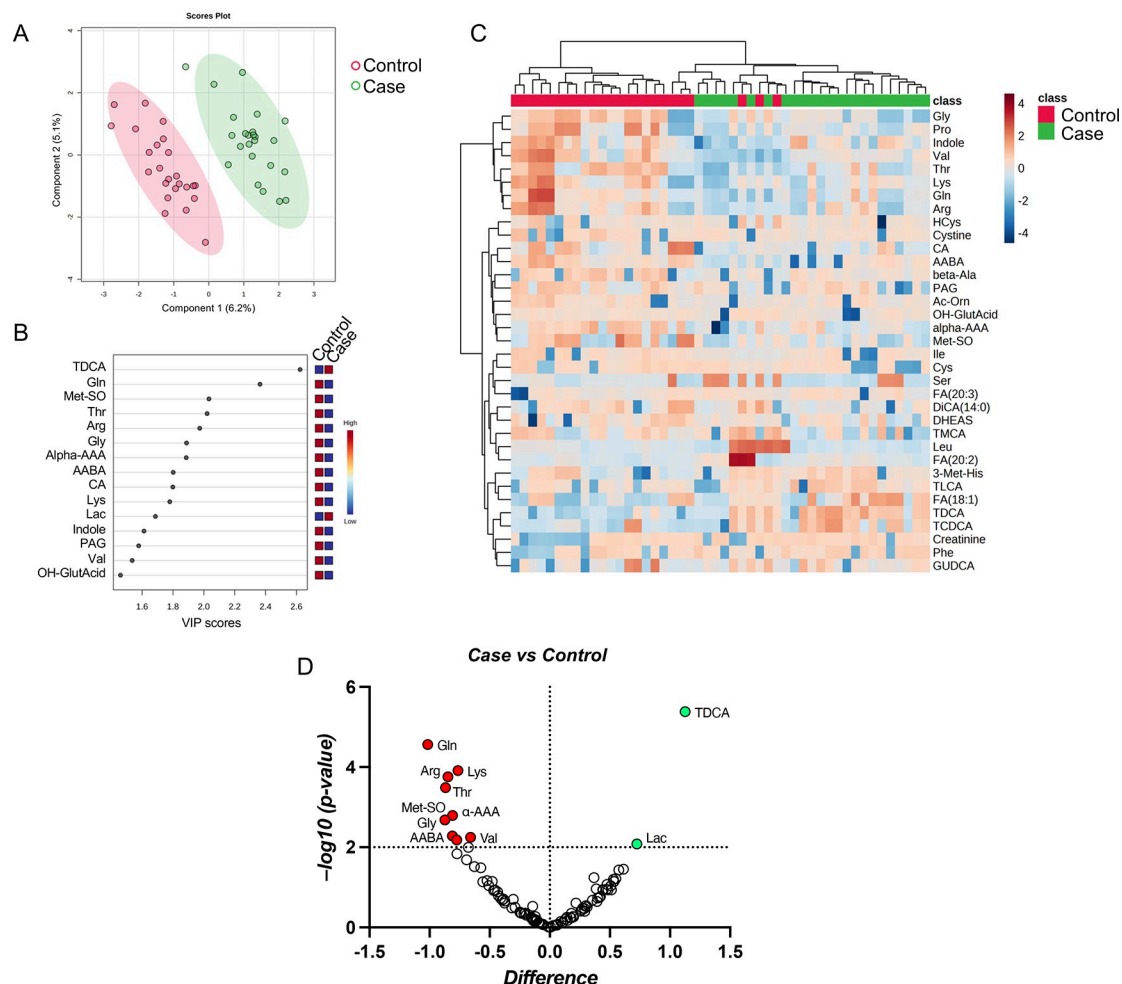

**Fig 4. Comparative metabolome analysis of case (fearful dogs) versus controls.** (A) PLS-DA analysis was performed using normalized metabolite levels from cases (green) and controls (red); (B) The top-15 discriminant features identified with values of VIP scores  $>1.5$  are reported. (C) Heatmap showing metabolite concentrations in each group and replicates. The intensity of the colored boxes represents the relative abundance of each molecule, whereas metabolite concentrations were normalized,  $\log_{10}$ -transformed, and auto-scaled. (D) Volcano plot analysis of metabolites significantly different in the comparison case vs control. The red and green dots represent the significant increased and decreased metabolites, respectively. Non-colored dots refer to all the molecules identified in the dataset whose relative abundance is not significantly different between groups.

<https://doi.org/10.1371/journal.pone.0315374.g004>

to the fearful phenotype. Among them, we selected those with concurrently highest impact and lowest p-value, namely 'glycine, serine and threonine metabolism', 'lysine degradation', 'glyoxylate and dicarboxylate metabolism' (Fig 5B). MSEA performed through ORA analysis revealed biologically meaningful terms associated with the differential metabolome of fearful dogs. ORA analysis enriched as significant ( $p < 0.05$ ) terms: 'glycine and serine metabolism', 'carnitine synthesis', 'urea cycle', 'lysine degradation', 'ammonia recycling', and 'aspartate metabolism' (Fig 5C).

## Discussion

In the present work, we documented the differential abundance of Proteobacteria and Firmicutes Phyla in fearful dogs suffering from generalized fear. Like in humans, companion animals diagnosed with such a behavioral disorder very often experience unreasonable, intense,

Table 2. Significant metabolites found differentially abundant in fearful dogs versus controls.

| Metabolite                    | P-value  | −log <sub>10</sub> (P-value) | Difference | SE of difference | Regulation |
|-------------------------------|----------|------------------------------|------------|------------------|------------|
| Glutamine (Gln)               | 0.000028 | 4.561                        | -1.015     | 0.1947           | Down       |
| Glycine (Gly)                 | 0.00523  | 2.281                        | -0.8107    | 0.2628           | Down       |
| α-Aminobutyric acid (AABA)    | 0.006575 | 2.182                        | -0.7736    | 0.2589           | Down       |
| α-Aminoadipic acid (α-AAA)    | 0.00161  | 2.793                        | -0.8099    | 0.2266           | Down       |
| Lysine (Lys)                  | 0.000123 | 3.91                         | -0.764     | 0.1657           | Down       |
| Methionine sulfoxide (Met-SO) | 0.002083 | 2.681                        | -0.873     | 0.2517           | Down       |
| Threonine (Thr)               | 0.000327 | 3.486                        | -0.8679    | 0.2057           | Down       |
| Arginine (Arg)                | 0.000174 | 3.759                        | -0.8473    | 0.1895           | Down       |
| Valine (Val)                  | 0.005669 | 2.247                        | -0.6594    | 0.2161           | Down       |
| Lactic acid (Lac)             | 0.008264 | 2.083                        | 0.724      | 0.2505           | Up         |
| Taurodeoxycholic acid (TDCA)  | 0.000004 | 5.383                        | 1.127      | 0.188            | Up         |

<https://doi.org/10.1371/journal.pone.0315374.t002>

and even excessive fright towards tangible stimuli or situations. These reactions can eventually trigger immediate responses and concomitant autonomic arousal, turning into escape, avoidance, or defensiveness behaviors [65]. Despite the huge amount of driving factors, dogs can also display fearful behaviors due to the lack of socialization during their early developmental phase (3–12 weeks of age), aversive experiences, as well as pharmacologic treatments or genetic susceptibility [66–70]. Furthermore, fear can lead to anxiety without the dissolution of fear itself, so that both may coexist in the same individual [71]. Tailored therapies, which generally rely on integrated approaches (drugs and behavioral treatment), are employed to reduce excessive fear or/ and anxiety reactions, by fostering positive and emotional situations, and avoiding punishment or correction during training activities [71, 72]. Indeed, dogs who suffer from generalized fear and anxiety generally require to be pharmacologically treated with selective serotonin reuptake inhibitors (SSRIs) or benzodiazepines, that allow them to cope with such a dysfunctional situation. Unfortunately, the owners' resistance in using medications, mostly associated with the occurrence of their side effects, including drowsiness, paradoxical arousal, vomiting, diarrhea, and restlessness, sometimes make pharmacological approach less feasible. Therefore, more thoughtful research, characterized by the development of new strategies to counteract mood-related dysfunctions is a way forward [73]. Compelling and growing evidence in mammals highlighted the crucial role of the microbiota, one of the main physiologic players within the gastrointestinal tract [74]. Previous studies found that germ-free mice exhibited alterations in immune systems, hormone signalling, metabolism, neurotransmission and synaptic plasticity, impacting upon physiologic homeostasis and development [74, 75]. Moreover, GI microbiota-depleted young mice, transplanted with the stool of the aged animals, showed age-dependent spatial learning and memory deficits, without affecting the short-term cognitive ability [76]. Thus, the overall intestinal microbiota has been regarded as one of the main peripheral modulators of CNS physiology, either by synapsing with vagus nerve, or passing through the blood brain barrier (BBB). The composition and integrity of the BBB can be affected by a dysfunctional GI microbiota, which makes it more permeable, most likely due to the reduced expression of tight junctions [77]. This altered permeability causes toxins to enter the brain, thus affecting the release of neurotransmitters, like serotonin, dopamine, GABA, and eventually bringing about mood-related disorders [78–81]. Our results documented an increase of Firmicutes-related taxa in the fearful dogs, being in line with previous findings, about an increase of the Firmicutes-related *Lactobacilli* in animals with emotional discomfort [20, 51]. Again, these aerotolerant anaerobic microbes increased in rescued dogs, who experienced intraspecific aggression [50, 82]. Studies from Mondo and colleagues (2020), showed

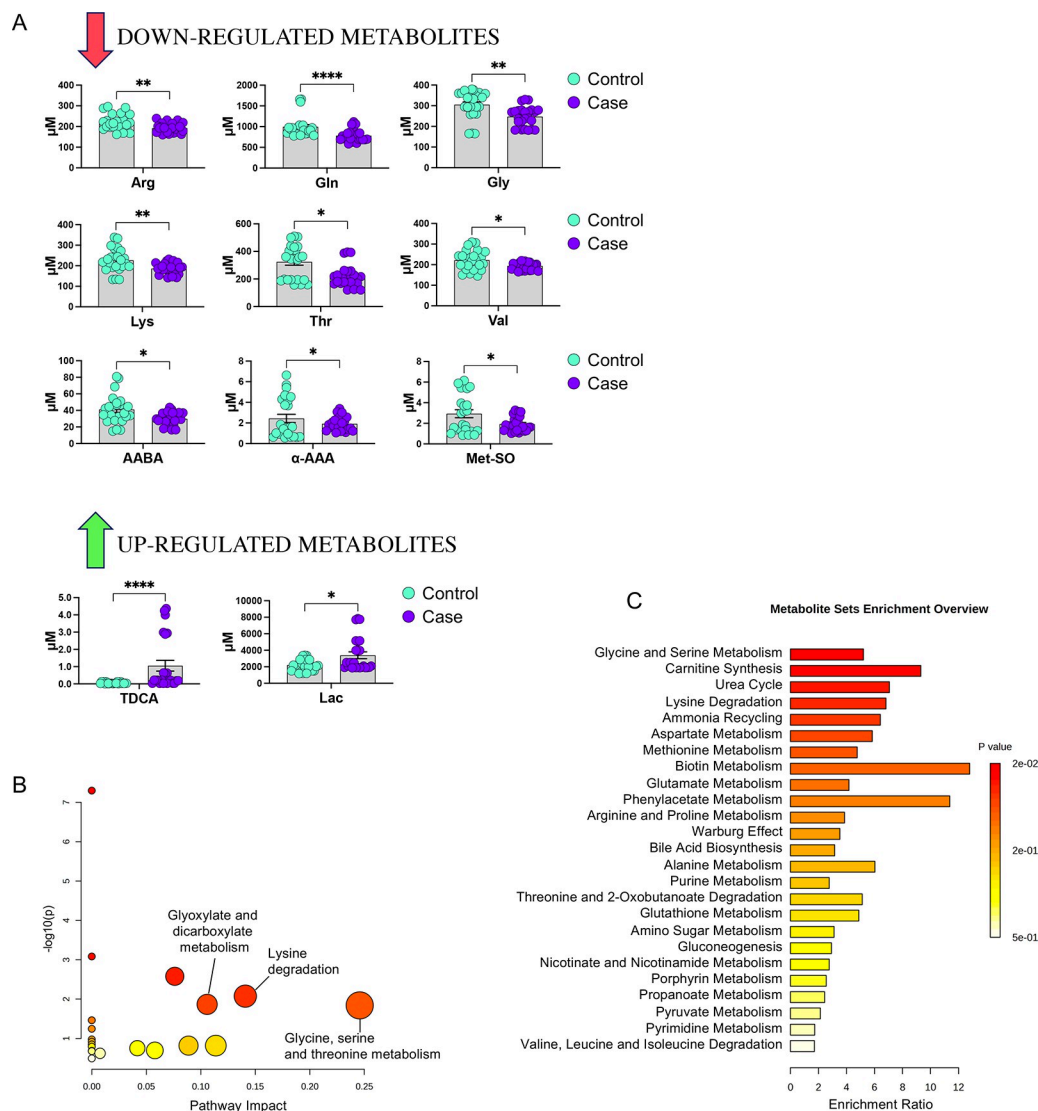

**Fig 5. Statistical analysis and bioinformatic pathway enrichment of single metabolites from the differential metabolome.** (A) The abundances of single metabolites were evaluated in case vs control by parametric or non-parametric t-test. The plots report the analyte concentrations (means  $\pm$  SEM on the bar, dots are all the measurements in replicates). The significance of statistical analysis is referred to as: \*  $p < 0.05$ , \*\*  $p < 0.01$ , \*\*\*\*  $p < 0.0001$ . (B) Pathway analysis plot with details of the significant pathways enriched by the analysis. (C) Overview of MSEA terms enriched with the over representation analysis (ORA) of significant metabolites. Nonetheless, to assess whether faecal species and circulating metabolites varied with the same trends in fearful animals, we performed a correlation analysis using both types of features. Significant microbiota species were correlated with the global metabolome, highlighting significant correlations (Fig 6). Interestingly, bile acids (namely TDCA, GUDCA, GLCA) were positively correlated with the *Peptostreptococcus Tissierellales* (Fig 6A), whereas some amino acids (Val, Thr, Lys) were associated to the *Dorea* (Fig 6B). Remarkably, many of these molecules were found as significant from both volcano plot and VIP analyses.

<https://doi.org/10.1371/journal.pone.0315374.g005>

that *Lactobacilli* were significantly higher in a group of German shepherds, who displayed a similar GI microbiota to that of depressed humans [83]. Moreover, *Lactobacillus Rhamnosus* was also found to reduce stress-associated corticosterone levels and anxiety-related behaviors and affect GABA-dependent neurotransmission in mice [84]. Taken together, it is conceivable that *Bacilli* could modulate several aspects of the microbiota-gut-brain axis, although care must be taken in extrapolating data, since identifying the precise mechanism underlying the

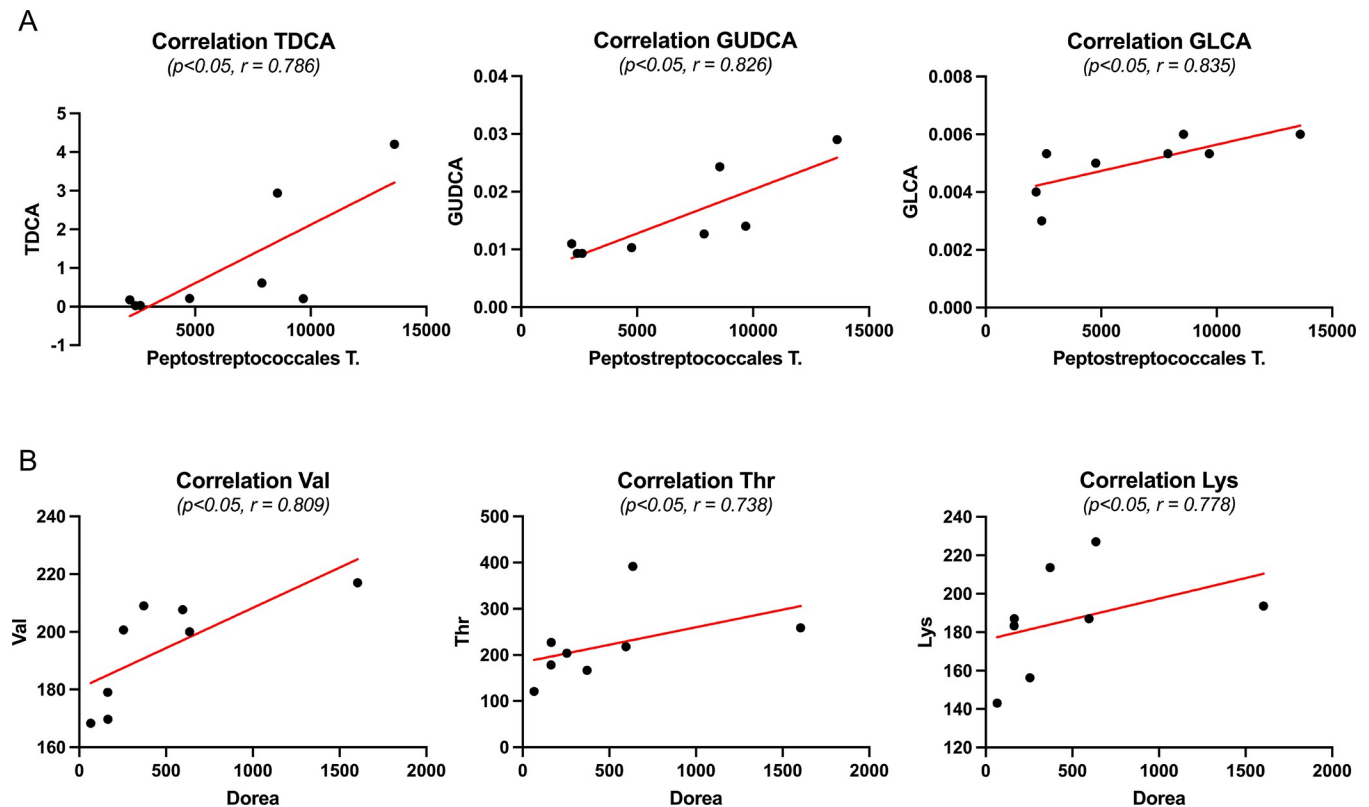

**Fig 6. Correlation analysis of the differential microbiome with the global metabolome.** Significantly correlating metabolites were reported for (A) *Peptostreptococcales T* and (B) *Dorea* organisms. The correlation plots report the computed  $r$  coefficient and the statistical significance ( $p$ ). TDCA: Taurodeoxycholic acid, GUDCA: Glycoursodeoxycholic acid, GLCA: Glycolithocholic acid, Val: Valine, Thr: Threonine, Lys: Lysine.

<https://doi.org/10.1371/journal.pone.0315374.g006>

observed increase of *Lactobacillus* in fearful dogs it not always immediate. Some anaerobic microbes belonging to Bacteroidetes and Firmicutes phyla generate butyrate, propionate and acetate as by-products of the indigestible polysaccharides' fermentation. These short-chain fatty acids (SCFAs), once crossing BBB, can affect cognition and mood-related behaviors [85]. According to our data, about a significant reduction of *Dorea* taxon in fearful dogs, lower levels of this Firmicutes-belonging genus were also previously found in humans and animals suffering from behavioral disorders [50, 86, 87]. Together with *Akkermansia* and *Ruminococcus*, *Dorea* abundance correlated with anxiety and depressive-like behavior in mice exposed to social defeat stress protocol, suggesting a potential role for such bacteria in the gut-brain axis communication [20, 88]. We found a direct correlation between gut *Dorea* abundance and serum levels of valine, threonine and lysine metabolites, which might represent metabolic substrates for SCFAs production [89].

The higher levels of the Firmicutes-related taxa found in our patients well fit with serum levels of lactic acid in fearful dogs, since they produce lactic acid, resulting in acidification of environment that can inhibit the growth of some pathogenic microorganisms [90]. It is well recognized that Firmicutes are involved in the conversion process of primary to secondary bile acids (and then deconjugating all the glyco- and tauro-conjugated forms) [91, 92], thereby hesitating in an antimicrobial function, which is more powerful than primary cholic acid, owing to its ability to damage microbial membranes. Accordingly, we found that *Peptostreptococcales Tissierellales* order, belonging to the Firmicutes phylum, positively correlated with TDCA, GUDCA and GLCA metabolites. Future studies, aimed at better disclosing the role of

*Peptostreptococcales Tissierellales* in the gut-brain axis, are required. Our metabolomic evaluations reported the downregulation of glycine in the blood of fearful patients which, together with glutamine and  $\alpha$ -Aminobutyric acid, can modulate GABA-dependent neurotransmission, and impact several psychiatric disorders in humans [93, 94]. We also found a significant reduction of serum  $\alpha$ -Aminoadipic acid levels that, as an intermediary metabolite of lysine and tryptophan, has been proven to antagonize neuroexcitatory activity modulated by the glutamate N-methyl-D-aspartate receptor [95].

Dysregulation of the GI microbiota, characterized by a relative increment of Proteobacteria, has been documented in IBS, metabolic and inflammatory disorders, so that these gram-negative microorganisms and their related taxa can be regarded as potential markers of microbiota instability [96–98]. The differential and quantitative analysis showed a lower abundance of Proteobacteria-related *Gammaproteobacteria* in the case group, allowing us to infer a putative compensatory effect, which comes into play to avoid the worsening of behavioral symptoms. However, more additional studies involving larger number of patients are needed to support this hypothesis.

On the other hand, a potential gender effect underlying the reduction of *Gammaproteobacteria* population in the case group (predominantly females) should be considered, since evidence in humans showed that Proteobacteria were more abundant in males than females [99]. Moreover, the higher incidence of female dogs suffering from fear and anxiety might be in accordance with human findings, showing that women are likely to double anxiety-related disorder chances [100].

Even though the sample size is small, which represents one of the main concerns of the manuscript, in the present study we involved individuals from different cities and fed with an overlapping dry commercial diet, to reduce nutritional and environmental variability. At present, it is hard to define whether alterations in the microbiota are the trigger or the consequence of behavioural changes. However, it is likely that both scenarios coexist in a vicious circle, with the initial trigger occurring both centrally and peripherally.

## Conclusions

Our data emphasized for the first time how fear and anxiety might be linked to significant dysregulation in both GI microbiota and blood metabolic homeostasis of family dogs affected by generalized fear. Despite recent advances in veterinary medicine, further investigation pointing towards multidisciplinary approaches are required, to better understand the pathophysiology of behavioral dysfunctions, and develop new pharmacological targets for canine mood-related disorders.

## Limitations

We recognize that our study involved a small number of patients, due to the tightening factors we have chosen as inclusion criteria in the recruitment and in the analyses performed. Future studies are mandatory to disentangle the role of the gut-brain axis homeostasis in the modulation of behavioral dysfunctions, enrolling a larger population of dogs, homogeneously clustered for environment, sex, size, lifestyles, and genetics.

## Supporting information

**S1 File.**  
(ZIP)



## Acknowledgments

The authors thank Dr. Rosanna Carpentieri and Dr. Anna Terracciano for supporting the study.

## Author Contributions

**Conceptualization:** Luigi Sacchettino, Francesco Napolitano, Danila d'Angelo.

**Data curation:** Michele Costanzo, Iolanda Veneruso, Valeria D'Argenio, Maria Mayer, Francesco Napolitano.

**Formal analysis:** Michele Costanzo, Iolanda Veneruso, Valeria D'Argenio, Maria Mayer.

**Resources:** Luigi Sacchettino, Danila d'Angelo.

**Supervision:** Francesco Napolitano, Danila d'Angelo.

**Writing – original draft:** Luigi Sacchettino, Michele Costanzo, Francesco Napolitano, Danila d'Angelo.

**Writing – review & editing:** Luigi Sacchettino, Michele Costanzo, Iolanda Veneruso, Valeria D'Argenio, Maria Mayer, Francesco Napolitano, Danila d'Angelo.

## References

1. Stinson LF, Boyce MC, Payne MS, Keelan JA. The Not-so-Sterile Womb: Evidence That the Human Fetus Is Exposed to Bacteria Prior to Birth. *Front Microbiol.* 2019; 10:1124. Epub 20190604. <https://doi.org/10.3389/fmicb.2019.01124> PMID: 31231319; PubMed Central PMCID: PMC6558212.
2. Koren O, Goodrich JK, Cullender TC, Spor A, Laitinen K, Backhed HK, et al. Host remodeling of the gut microbiome and metabolic changes during pregnancy. *Cell.* 2012; 150(3):470–80. <https://doi.org/10.1016/j.cell.2012.07.008> PMID: 22863002; PubMed Central PMCID: PMC3505857.
3. Browne HP, Shao Y, Lawley TD. Mother-infant transmission of human microbiota. *Curr Opin Microbiol.* 2022; 69:102173. Epub 20220701. <https://doi.org/10.1016/j.mib.2022.102173> PMID: 35785616.
4. Swanson KS, Suchodolski JS, Turnbaugh PJ. Companion animals symposium: microbes and health. *J Anim Sci.* 2011; 89(5):1496–7. <https://doi.org/10.2527/jas.2011-3873> PMID: 21521817.
5. Lee AH, Jha AR, Do S, Scarsella E, Shmalberg J, Schauwecker A, et al. Dietary enrichment of resistant starches or fibers differentially alter the feline fecal microbiome and metabolite profile. *Anim Microbiome.* 2022; 4(1):61. Epub 20221205. <https://doi.org/10.1186/s42523-022-00213-9> PMID: 36471455; PubMed Central PMCID: PMC9720964.
6. Coelho LP, Kultima JR, Costea PI, Fournier C, Pan Y, Czarnecki-Maulden G, et al. Similarity of the dog and human gut microbiomes in gene content and response to diet. *Microbiome.* 2018; 6(1):72. Epub 20180419. <https://doi.org/10.1186/s40168-018-0450-3> PMID: 29669589; PubMed Central PMCID: PMC5907387.
7. Deng P, Swanson KS. Gut microbiota of humans, dogs and cats: current knowledge and future opportunities and challenges. *Br J Nutr.* 2015; 113 Suppl:S6–17. Epub 20141121. <https://doi.org/10.1017/S0007114514002943> PMID: 25414978.
8. Song SJ, Lauber C, Costello EK, Lozupone CA, Humphrey G, Berg-Lyons D, et al. Cohabiting family members share microbiota with one another and with their dogs. *Elife.* 2013; 2:e00458. Epub 20130416. <https://doi.org/10.7554/eLife.00458> PMID: 23599893; PubMed Central PMCID: PMC3628085.
9. Alessandri G, Milani C, Mancabelli L, Mangifesta M, Lugli GA, Viappiani A, et al. Metagenomic dissection of the canine gut microbiota: insights into taxonomic, metabolic and nutritional features. *Environ Microbiol.* 2019; 21(4):1331–43. Epub 20190318. <https://doi.org/10.1111/1462-2920.14540> PMID: 30680877.
10. Handl S, Dowd SE, Garcia-Mazcorro JF, Steiner JM, Suchodolski JS. Massive parallel 16S rRNA gene pyrosequencing reveals highly diverse fecal bacterial and fungal communities in healthy dogs and cats. *FEMS Microbiol Ecol.* 2011; 76(2):301–10. Epub 20110214. <https://doi.org/10.1111/j.1574-6941.2011.01058.x> PMID: 21261668.

11. You I, Kim MJ. Comparison of Gut Microbiota of 96 Healthy Dogs by Individual Traits: Breed, Age, and Body Condition Score. *Animals (Basel)*. 2021; 11(8). Epub 20210818. <https://doi.org/10.3390/ani11082432> PMID: 34438891; PubMed Central PMCID: PMC8388711.
12. Tropini C, Earle KA, Huang KC, Sonnenburg JL. The Gut Microbiome: Connecting Spatial Organization to Function. *Cell Host Microbe*. 2017; 21(4):433–42. <https://doi.org/10.1016/j.chom.2017.03.010> PMID: 28407481; PubMed Central PMCID: PMC5576359.
13. Buddington RK. Postnatal changes in bacterial populations in the gastrointestinal tract of dogs. *Am J Vet Res*. 2003; 64(5):646–51. <https://doi.org/10.2460/ajvr.2003.64.646> PMID: 12755306.
14. Honneffer JB, Minamoto Y, Suchodolski JS. Microbiota alterations in acute and chronic gastrointestinal inflammation of cats and dogs. *World J Gastroenterol*. 2014; 20(44):16489–97. <https://doi.org/10.3748/wjg.v20.i44.16489> PMID: 25469017; PubMed Central PMCID: PMC4248192.
15. Suchodolski JS. Companion animals symposium: microbes and gastrointestinal health of dogs and cats. *J Anim Sci*. 2011; 89(5):1520–30. Epub 20101112. <https://doi.org/10.2527/jas.2010-3377> PMID: 21075970; PubMed Central PMCID: PMC7199667.
16. Pilla R, Suchodolski JS. The Role of the Canine Gut Microbiome and Metabolome in Health and Gastrointestinal Disease. *Front Vet Sci*. 2019; 6:498. Epub 20200114. <https://doi.org/10.3389/fvets.2019.00498> PMID: 31993446; PubMed Central PMCID: PMC6971114.
17. Vazquez-Baeza Y, Hyde ER, Suchodolski JS, Knight R. Dog and human inflammatory bowel disease rely on overlapping yet distinct dysbiosis networks. *Nat Microbiol*. 2016; 1:16177. Epub 20161003. <https://doi.org/10.1038/nmicrobiol.2016.177> PMID: 27694806.
18. Hasan N, Yang H. Factors affecting the composition of the gut microbiota, and its modulation. *PeerJ*. 2019; 7:e7502. Epub 20190816. <https://doi.org/10.7717/peerj.7502> PMID: 31440436; PubMed Central PMCID: PMC6699480.
19. Reddy KE, Kim HR, Jeong JY, So KM, Lee S, Ji SY, et al. Impact of Breed on the Fecal Microbiome of Dogs under the Same Dietary Condition. *J Microbiol Biotechnol*. 2019; 29(12):1947–56. <https://doi.org/10.4014/jmb.1906.06048> PMID: 31601060.
20. Craddock HA, Godneva A, Rothschild D, Motro Y, Grinstein D, Lotem-Michaeli Y, et al. Phenotypic correlates of the working dog microbiome. *NPJ Biofilms Microbiomes*. 2022; 8(1):66. Epub 20220822. <https://doi.org/10.1038/s41522-022-00329-5> PMID: 35995802; PubMed Central PMCID: PMC9395329.
21. Thomson P, Santibanez R, Rodriguez-Salas C, Flores-Yanez C, Garrido D. Differences in the composition and predicted functions of the intestinal microbiome of obese and normal weight adult dogs. *PeerJ*. 2022; 10:e12695. Epub 20220216. <https://doi.org/10.7717/peerj.12695> PMID: 35190784; PubMed Central PMCID: PMC8857902.
22. Scarsella E, Stefanon B, Cintio M, Licastro D, Sgorlon S, Dal Monego S, et al. Learning machine approach reveals microbial signatures of diet and sex in dog. *PLoS One*. 2020; 15(8):e0237874. Epub 20200817. <https://doi.org/10.1371/journal.pone.0237874> PMID: 32804973; PubMed Central PMCID: PMC7431105.
23. Caterino M, Ruoppolo M, Costanzo M, Albano L, Crisci D, Sotgiu G, et al. Sex Affects Human Premature Neonates' Blood Metabolome According to Gestational Age, Parenteral Nutrition, and Caffeine Treatment. *Metabolites*. 2021; 11(3). Epub 20210309. <https://doi.org/10.3390/metabo11030158> PMID: 33803435; PubMed Central PMCID: PMC8000935.
24. Kim YS, Unno T, Kim BY, Park MS. Sex Differences in Gut Microbiota. *World J Mens Health*. 2020; 38(1):48–60. Epub 20190325. <https://doi.org/10.5534/wjmh.190009> PMID: 30929328; PubMed Central PMCID: PMC6920072.
25. Garcia-Mazcorro JF, Suchodolski JS, Jones KR, Clark-Price SC, Dowd SE, Minamoto Y, et al. Effect of the proton pump inhibitor omeprazole on the gastrointestinal bacterial microbiota of healthy dogs. *FEMS Microbiol Ecol*. 2012; 80(3):624–36. Epub 20120312. <https://doi.org/10.1111/j.1574-6941.2012.01331.x> PMID: 22324305.
26. Zhang W, Qu W, Wang H, Yan H. Antidepressants fluoxetine and amitriptyline induce alterations in intestinal microbiota and gut microbiome function in rats exposed to chronic unpredictable mild stress. *Transl Psychiatry*. 2021; 11(1):131. Epub 20210218. <https://doi.org/10.1038/s41398-021-01254-5> PMID: 33602895; PubMed Central PMCID: PMC7892574.
27. Gronvold AML, Abee-Lund TM, Sorum H, Skancke E, Yannarell AC, Mackie RI. Changes in fecal microbiota of healthy dogs administered amoxicillin. *FEMS Microbiol Ecol*. 2010; 71(2):313–26. Epub 20091104. <https://doi.org/10.1111/j.1574-6941.2009.00808.x> PMID: 20002181.
28. Maier L, Goemans CV, Wirbel J, Kuhn M, Eberl C, Pruteanu M, et al. Unravelling the collateral damage of antibiotics on gut bacteria. *Nature*. 2021; 599(7883):120–4. Epub 20211013. <https://doi.org/10.1038/s41586-021-03986-2> PMID: 34646011; PubMed Central PMCID: PMC7612847.

29. Atherly T, Rossi G, White R, Seo YJ, Wang C, Ackermann M, et al. Glucocorticoid and dietary effects on mucosal microbiota in canine inflammatory bowel disease. *PLoS One*. 2019; 14(12):e0226780. Epub 20191230. <https://doi.org/10.1371/journal.pone.0226780> PMID: 31887117; PubMed Central PMCID: PMC6936794.
30. Sylvia KE, Jewell CP, Rendon NM, St John EA, Demas GE. Sex-specific modulation of the gut microbiome and behavior in Siberian hamsters. *Brain Behav Immun*. 2017; 60:51–62. Epub 20161102. <https://doi.org/10.1016/j.bbi.2016.10.023> PMID: 27816476.
31. Chen LL, Abbaspour A, Mkoma GF, Bulik CM, Ruck C, Djurfeldt D. Gut Microbiota in Psychiatric Disorders: A Systematic Review. *Psychosom Med*. 2021; 83(7):679–92. <https://doi.org/10.1097/PSY.0000000000000959> PMID: 34117156; PubMed Central PMCID: PMC8428865.
32. Mondo E, Marliani G, Accorsi PA, Cocchi M, Di Leone A. Role of gut microbiota in dog and cat's health and diseases. *Open Vet J*. 2019; 9(3):253–8. Epub 20190901. <https://doi.org/10.4314/ovj.v9i3.10> PMID: 31998619; PubMed Central PMCID: PMC6794400.
33. Wernimont SM, Radosevich J, Jackson MI, Ephraim E, Badri DV, MacLeay JM, et al. The Effects of Nutrition on the Gastrointestinal Microbiome of Cats and Dogs: Impact on Health and Disease. *Front Microbiol*. 2020; 11:1266. Epub 20200625. <https://doi.org/10.3389/fmicb.2020.01266> PMID: 32670224; PubMed Central PMCID: PMC7329990.
34. Sacoar C, Marugg JD, Lima NR, Empadinhas N, Montezinho L. Gut-Brain Axis Impact on Canine Anxiety Disorders: New Challenges for Behavioral Veterinary Medicine. *Vet Med Int*. 2024; 2024:2856759. Epub 20240123. <https://doi.org/10.1155/2024/2856759> PMID: 38292207; PubMed Central PMCID: PMC10827376.
35. Kielbik P, Witkowska-Pilaszewicz O. The Relationship between Canine Behavioral Disorders and Gut Microbiome and Future Therapeutic Perspectives. *Animals*. 2024;14. <https://doi.org/10.3390/ani14142048> PMID: 39061510
36. Forsythe P, Sudo N, Dinan T, Taylor VH, Bienenstock J. Mood and gut feelings. *Brain Behav Immun*. 2010; 24(1):9–16. Epub 20090528. <https://doi.org/10.1016/j.bbi.2009.05.058> PMID: 19481599.
37. Fung TC. The microbiota-immune axis as a central mediator of gut-brain communication. *Neurobiol Dis*. 2020; 136:104714. Epub 20191214. <https://doi.org/10.1016/j.nbd.2019.104714> PMID: 31846737.
38. Fung TC, Olson CA, Hsiao EY. Interactions between the microbiota, immune and nervous systems in health and disease. *Nat Neurosci*. 2017; 20(2):145–55. Epub 20170116. <https://doi.org/10.1038/nn.4476> PMID: 28092661; PubMed Central PMCID: PMC6960010.
39. Strandwitz P. Neurotransmitter modulation by the gut microbiota. *Brain Res*. 2018; 1693(Pt B):128–33. <https://doi.org/10.1016/j.brainres.2018.03.015> PMID: 29903615; PubMed Central PMCID: PMC6005194.
40. Barrett E, Ross RP, O'Toole PW, Fitzgerald GF, Stanton C. gamma-Aminobutyric acid production by culturable bacteria from the human intestine. *J Appl Microbiol*. 2012; 113(2):411–7. Epub 20120615. <https://doi.org/10.1111/j.1365-2672.2012.05344.x> PMID: 22612585.
41. Carabotti M, Scirocco A, Maselli MA, Severi C. The gut-brain axis: interactions between enteric microbiota, central and enteric nervous systems. *Ann Gastroenterol*. 2015; 28(2):203–9. PMID: 25830558; PubMed Central PMCID: PMC4367209.
42. Kar SK, Menon V, Agarwal A. Gut-brain interaction: scope of neuromodulation techniques. *CNS Spectr*. 2022; 27(5):547. Epub 20210715. <https://doi.org/10.1017/S1092852921000651> PMID: 34261573.
43. Costanzo M, Caterino M, Ruoppolo M. Targeted metabolomics. *Metabolomics Perspectives From Theory to Practical Application*. 2022:219–36. <https://doi.org/10.1016/B978-0-323-85062-9.00006-4>
44. Roviello GN, Roviello G, Musumeci D, Capasso D, Gaetano S, Costanzo M, et al. Synthesis and supramolecular assembly of 1,3- bis(10-uracilyl)-2-propanone. *RSC Advances*. 2014; 4. <https://doi.org/10.1039/c4ra03713h>
45. Lamichhane S, Sen P, Dickens AM, Oresic M, Bertram HC. Gut metabolome meets microbiome: A methodological perspective to understand the relationship between host and microbe. *Methods*. 2018; 149:3–12. Epub 20180430. <https://doi.org/10.1016/j.ymeth.2018.04.029> PMID: 29715508.
46. Foster KR, Schluter J, Coyte KZ, Rakoff-Nahoum S. The evolution of the host microbiome as an ecosystem on a leash. *Nature*. 2017; 548(7665):43–51. <https://doi.org/10.1038/nature23292> PMID: 28770836; PubMed Central PMCID: PMC5749636.
47. Rousseaux C, Thuru X, Gelot A, Barnich N, Neut C, Dubuquoy L, et al. Lactobacillus acidophilus modulates intestinal pain and induces opioid and cannabinoid receptors. *Nat Med*. 2007; 13(1):35–7. Epub 20061210. <https://doi.org/10.1038/nm1521> PMID: 17159985.
48. Hillestad EMR, van der Meeren A, Nagaraja BH, Bjorsvik BR, Haleem N, Benitez-Paez A, et al. Gut bless you: The microbiota-gut-brain axis in irritable bowel syndrome. *World J Gastroenterol*. 2022; 28

- (4):412–31. <https://doi.org/10.3748/wjg.v28.i4.412> PMID: 35125827; PubMed Central PMCID: PMC8790555.
49. Ringel Y, Ringel-Kulka T. The Intestinal Microbiota and Irritable Bowel Syndrome. *J Clin Gastroenterol*. 2015; 49 Suppl 1:S56–9. <https://doi.org/10.1097/MCG.0000000000000418> PMID: 26447966.
50. Kirchoff NS, Udell MAR, Sharpton TJ. The gut microbiome correlates with conspecific aggression in a small population of rescued dogs (*Canis familiaris*). *PeerJ*. 2019; 7:e6103. Epub 20190109. <https://doi.org/10.7717/peerj.6103> PMID: 30643689; PubMed Central PMCID: PMC6330041.
51. Mondo E, Barone M, Soverini M, D'Amico F, Cocchi M, Petrulli C, et al. Gut microbiome structure and adrenocortical activity in dogs with aggressive and phobic behavioral disorders. *Heliyon*. 2020; 6(1): e03311. Epub 20200129. <https://doi.org/10.1016/j.heliyon.2020.e03311> PMID: 32021942; PubMed Central PMCID: PMC6994854.
52. Cannas S, Tonini B, Belà B, Di Prinzio R, Pignataro G, Di Simone D, et al. Effect of a novel nutraceutical supplement (Relaxigen Pet dog) on the fecal microbiome and stress-related behaviors in dogs: A pilot study. *Journal Of Veterinary Behavior*. 2021; 42:37–47. <https://doi.org/10.1016/j.jveb.2020.09.002>.
53. Amat M, Le Brech S, Manteca X. The Relationship Between Aggression and Physical Disease in Dogs. *Vet Clin North Am Small Anim Pract*. 2024; 54(1):43–53. Epub 20230914. <https://doi.org/10.1016/j.cvsm.2023.08.008> PMID: 37714772.
54. Camps T, Amat M, Manteca X. A Review of Medical Conditions and Behavioral Problems in Dogs and Cats. *Animals (Basel)*. 2019; 9(12). Epub 20191212. <https://doi.org/10.3390/ani9121133> PMID: 31842492; PubMed Central PMCID: PMC6941081.
55. Percie du Sert N, Ahluwalia A, Alam S, Avey MT, Baker M, Browne WJ, et al. Reporting animal research: Explanation and elaboration for the ARRIVE guidelines 2.0. *PLoS Biol*. 2020; 18(7): e3000411. Epub 20200714. <https://doi.org/10.1371/journal.pbio.3000411> PMID: 32663221; PubMed Central PMCID: PMC7360025.
56. D'Argenio V, Veneruso I, Gong C, Cecarini V, Bonfili L, Eleuteri AM. Gut Microbiome and Mycobiome Alterations in an In Vivo Model of Alzheimer's Disease. *Genes (Basel)*. 2022; 13(9). Epub 20220831. <https://doi.org/10.3390/genes13091564> PMID: 36140732; PubMed Central PMCID: PMC9498768.
57. Veneruso I, Cariati F, Alviggi C, Pastore L, Tomaiuolo R, D'Argenio V. Metagenomics Reveals Specific Microbial Features in Males with Semen Alterations. *Genes (Basel)*. 2023; 14(6). Epub 20230606. <https://doi.org/10.3390/genes14061228> PMID: 37372408; PubMed Central PMCID: PMC10298125.
58. Dhariwal A, Chong J, Habib S, King IL, Agellon LB, Xia J. MicrobiomeAnalyst: a web-based tool for comprehensive statistical, visual and meta-analysis of microbiome data. *Nucleic Acids Res*. 2017; 45 (W1):W180–W8. <https://doi.org/10.1093/nar/gkx295> PMID: 28449106; PubMed Central PMCID: PMC5570177.
59. Campesi I, Capobianco G, Cano A, Lodde V, Cruciani S, Maioli M, et al. Stratification of Amniotic Fluid Cells and Amniotic Fluid by Sex Opens Up New Perspectives on Fetal Health. *Biomedicines*. 2023; 11 (10). Epub 20231018. <https://doi.org/10.3390/biomedicines11102830> PMID: 37893203; PubMed Central PMCID: PMC10604128.
60. Costanzo M, Caterino M. Targeted lipidomics data of COVID-19 patients. *Data Brief*. 2023; 48:109089. Epub 20230329. <https://doi.org/10.1016/j.dib.2023.109089> PMID: 37006392; PubMed Central PMCID: PMC10050192.
61. Costanzo M, Caterino M, Salvatori I, Manganelli V, Ferri A, Misasi R, et al. Proteome data of neuroblastoma cells overexpressing Neuroglobin. *Data Brief*. 2022; 41:107843. Epub 20220120. <https://doi.org/10.1016/j.dib.2022.107843> PMID: 35128003; PubMed Central PMCID: PMC8800053.
62. Manganelli V, Salvatori I, Costanzo M, Capozzi A, Caissutti D, Caterino M, et al. Overexpression of Neuroglobin Promotes Energy Metabolism and Autophagy Induction in Human Neuroblastoma SH-SY5Y Cells. *Cells*. 2021; 10(12). Epub 20211202. <https://doi.org/10.3390/cells10123394> PMID: 34943907; PubMed Central PMCID: PMC8699457.
63. Xia J, Wishart DS. MSEA: a web-based tool to identify biologically meaningful patterns in quantitative metabolomic data. *Nucleic Acids Res*. 2010; 38(Web Server issue):W71–7. Epub 20100510. <https://doi.org/10.1093/nar/gkq329> PMID: 20457745; PubMed Central PMCID: PMC2896187.
64. Gonzalez Melo M, Fontana AO, Viertl D, Allenbach G, Prior JO, Rotman S, et al. A knock-in rat model unravels acute and chronic renal toxicity in glutaric aciduria type I. *Mol Genet Metab*. 2021; 134 (4):287–300. Epub 20211110. <https://doi.org/10.1016/j.ymgme.2021.10.003> PMID: 34799272.
65. Sherman BL, Mills DS. Canine anxieties and phobias: an update on separation anxiety and noise aversions. *Vet Clin North Am Small Anim Pract*. 2008; 38(5):1081–106, vii. <https://doi.org/10.1016/j.cvsm.2008.04.012> PMID: 18672155.
66. Sacchetti L, Gatta C, Chirico A, Avallone L, Napolitano F, d'Angelo D. Puppies Raised during the COVID-19 Lockdown Showed Fearful and Aggressive Behaviors in Adulthood: An Italian Survey. *Vet*

- Sci. 2023; 10(3). Epub 20230305. <https://doi.org/10.3390/vetsci10030198> PMID: 36977237; PubMed Central PMCID: PMC10059587.
67. Tiira K, Lohi H. Early Life Experiences and Exercise Associate with Canine Anxieties. *PLoS One*. 2015; 10(11):e0141907. Epub 20151103. <https://doi.org/10.1371/journal.pone.0141907> PMID: 26528555; PubMed Central PMCID: PMC4631323.
  68. Sarviaho R, Hakosalo O, Tiira K, Sulkama S, Salmela E, Hytonen MK, et al. Two novel genomic regions associated with fearfulness in dogs overlap human neuropsychiatric loci. *Transl Psychiatry*. 2019; 9(1):18. Epub 20190117. <https://doi.org/10.1038/s41398-018-0361-x> PMID: 30655508; PubMed Central PMCID: PMC6336819.
  69. Craven AJ, Pegram C, Packer RMA, Jarvis S, McGreevy PD, Warnes C, et al. Veterinary drug therapies used for undesirable behaviours in UK dogs under primary veterinary care. *PLoS One*. 2022; 17(1):e0261139. Epub 20220112. <https://doi.org/10.1371/journal.pone.0261139> PMID: 35020726; PubMed Central PMCID: PMC8754320.
  70. Seksel K. Preventing behavior problems in puppies and kittens. *Vet Clin North Am Small Anim Pract*. 2008; 38(5):971–82, v-vi. <https://doi.org/10.1016/j.cvsm.2008.04.003> PMID: 18672149.
  71. Landsberg G, Radosta L, Ackerman L. Behavior Problems of the Dog and Cat. 2023.
  72. Sacchettino L, Giuliano VO, Avallone L, Napolitano F, d'Angelo D. Combining alpha-s1 Casozepine and Fluoxetine Treatment with a Behavioral Therapy Improves Symptoms in an Aggressive Dog: An Italian Case Report. *Vet Sci*. 2023; 10(7). Epub 20230704. <https://doi.org/10.3390/vetsci10070435> PMID: 37505840; PubMed Central PMCID: PMC10384918.
  73. Sacchettino L, Gatta C, Maruccio L, Boncompagni C, Napolitano F, Avallone L, et al. Combining cannabis and melatonin treatment with a rehabilitation program improved symptoms in a dog with compulsive disorder: A case report. *Res Vet Sci*. 2023; 160:26–9. Epub 20230524. <https://doi.org/10.1016/j.rvsc.2023.05.007> PMID: 37245289.
  74. Cryan JF, Riordan KJ, Cowan CSM, Sandhu KV, Bastiaanssen TFS, Boehme M, et al. The Microbiota-Gut-Brain Axis. *Physiol Rev*. 2019; 99(4):1877–2013. <https://doi.org/10.1152/physrev.00018.2018> PMID: 31460832.
  75. Hoban AE, Stilling RM, Moloney G, Shanahan F, Dinan TG, Clarke G, et al. The microbiome regulates amygdala-dependent fear recall. *Mol Psychiatry*. 2018; 23(5):1134–44. Epub 20170516. <https://doi.org/10.1038/mp.2017.100> PMID: 28507320; PubMed Central PMCID: PMC5984090.
  76. D'Amato A, Di Cesare Mannelli L, Lucarini E, Man AL, Le Gall G, Branca JJV, et al. Faecal microbiota transplant from aged donor mice affects spatial learning and memory via modulating hippocampal synaptic plasticity- and neurotransmission-related proteins in young recipients. *Microbiome*. 2020; 8(1):140. Epub 20201001. <https://doi.org/10.1186/s40168-020-00914-w> PMID: 33004079; PubMed Central PMCID: PMC7532115.
  77. Braniste V, Al-Asmakh M, Kowal C, Anuar F, Abbaspour A, Toth M, et al. The gut microbiota influences blood-brain barrier permeability in mice. *Sci Transl Med*. 2014; 6(263):263ra158. <https://doi.org/10.1126/scitranslmed.3009759> PMID: 25411471; PubMed Central PMCID: PMC4396848.
  78. Peirce JM, Alvina K. The role of inflammation and the gut microbiome in depression and anxiety. *J Neurosci Res*. 2019; 97(10):1223–41. Epub 20190529. <https://doi.org/10.1002/jnr.24476> PMID: 31144383.
  79. de Punder K, Pruimboom L. Stress induces endotoxemia and low-grade inflammation by increasing barrier permeability. *Front Immunol*. 2015; 6:223. Epub 20150515. <https://doi.org/10.3389/fimmu.2015.00223> PMID: 26029209; PubMed Central PMCID: PMC4432792.
  80. Luo Y, Zeng B, Zeng L, Du X, Li B, Huo R, et al. Gut microbiota regulates mouse behaviors through glucocorticoid receptor pathway genes in the hippocampus. *Transl Psychiatry*. 2018; 8(1):187. Epub 20180907. <https://doi.org/10.1038/s41398-018-0240-5> PMID: 30194287; PubMed Central PMCID: PMC6128920.
  81. Winter G, Hart RA, Charlesworth RPG, Sharpley CF. Gut microbiome and depression: what we know and what we need to know. *Rev Neurosci*. 2018; 29(6):629–43. <https://doi.org/10.1515/revneuro-2017-0072> PMID: 29397391.
  82. Klein G, Pack A, Bonaparte C, Reuter G. Taxonomy and physiology of probiotic lactic acid bacteria. *Int J Food Microbiol*. 1998; 41(2):103–25. [https://doi.org/10.1016/s0168-1605\(98\)00049-x](https://doi.org/10.1016/s0168-1605(98)00049-x) PMID: 9704860.
  83. Mondo E, De Cesare A, Manfreda G, Sala C, Cascio G, Accorsi PA, et al. Depression and Microbiome—Study on the Relation and Contiguity between Dogs and Humans. *Appl Sci*. 2020; 10. <https://doi.org/10.3390/app10020573>
  84. Bravo JA, Forsythe P, Chew MV, Escaravage E, Savignac HM, Dinan TG, et al. Ingestion of Lactobacillus strain regulates emotional behavior and central GABA receptor expression in a mouse via the



- vagus nerve. *Proc Natl Acad Sci U S A*. 2011; 108(38):16050–5. Epub 20110829. <https://doi.org/10.1073/pnas.1102999108> PMID: 21876150; PubMed Central PMCID: PMC3179073.
85. Luca M, Chattipakorn SC, Sriwichaiin S, Luca A. Cognitive-Behavioural Correlates of Dysbiosis: A Review. *Int J Mol Sci*. 2020; 21(14). Epub 20200708. <https://doi.org/10.3390/ijms21144834> PMID: 32650553; PubMed Central PMCID: PMC7402132.
  86. Shen Y, Xu J, Li Z, Huang Y, Yuan Y, Wang J, et al. Analysis of gut microbiota diversity and auxiliary diagnosis as a biomarker in patients with schizophrenia: A cross-sectional study. *Schizophr Res*. 2018; 197:470–7. Epub 20180117. <https://doi.org/10.1016/j.schres.2018.01.002> PMID: 29352709.
  87. Homer B, Judd J, Mohammadi Dehcheshmeh M, Ebrahimie E, Trott DJ. Gut Microbiota and Behavioural Issues in Production, Performance, and Companion Animals: A Systematic Review. *Animals (Basel)*. 2023; 13(9). Epub 20230425. <https://doi.org/10.3390/ani13091458> PMID: 37174495; PubMed Central PMCID: PMC10177538.
  88. McGaughey KD, Yilmaz-Swenson T, Elsayed NM, Cruz DA, Rodriguiz RM, Kritzer MD, et al. Relative abundance of *Akkermansia* spp. and other bacterial phylotypes correlates with anxiety- and depressive-like behavior following social defeat in mice. *Sci Rep*. 2019; 9(1):3281. Epub 20190301. <https://doi.org/10.1038/s41598-019-40140-5> PMID: 30824791; PubMed Central PMCID: PMC6397238.
  89. Silva YP, Bernardi A, Frozza RL. The Role of Short-Chain Fatty Acids From Gut Microbiota in Gut-Brain Communication. *Front Endocrinol (Lausanne)*. 2020; 11:25. Epub 20200131. <https://doi.org/10.3389/fendo.2020.00025> PMID: 32082260; PubMed Central PMCID: PMC7005631.
  90. Wilson WA, Roach PJ, Montero M, Baroja-Fernandez E, Munoz FJ, Eydallin G, et al. Regulation of glycolysis in yeast and bacteria. *FEMS Microbiol Rev*. 2010; 34(6):952–85. <https://doi.org/10.1111/j.1574-6976.2010.00220.x> PMID: 20412306; PubMed Central PMCID: PMC2927715.
  91. Ridlon JM, Bajaj JS. The human gut sterolbiome: bile acid-microbiome endocrine aspects and therapeutics. *Acta Pharm Sin B*. 2015; 5(2):99–105. Epub 20150209. <https://doi.org/10.1016/j.apsb.2015.01.006> PMID: 26579434; PubMed Central PMCID: PMC4629220.
  92. Jones BV, Begley M, Hill C, Gahan CG, Marchesi JR. Functional and comparative metagenomic analysis of bile salt hydrolase activity in the human gut microbiome. *Proc Natl Acad Sci U S A*. 2008; 105(36):13580–5. Epub 20080829. <https://doi.org/10.1073/pnas.0804437105> PMID: 18757757; PubMed Central PMCID: PMC2533232.
  93. Zheng P, Zeng B, Zhou C, Liu M, Fang Z, Xu X, et al. Gut microbiome remodeling induces depressive-like behaviors through a pathway mediated by the host's metabolism. *Mol Psychiatry*. 2016; 21(6):786–96. Epub 20160412. <https://doi.org/10.1038/mp.2016.44> PMID: 27067014.
  94. Gagliano A, Murgia F, Capodiferro AM, Tanca MG, Hendren A, Falqui SG, et al. (1)H-NMR-Based Metabolomics in Autism Spectrum Disorder and Pediatric Acute-Onset Neuropsychiatric Syndrome. *J Clin Med*. 2022; 11(21). Epub 20221101. <https://doi.org/10.3390/jcm11216493> PMID: 36362721; PubMed Central PMCID: PMC9658067.
  95. Haugstad TS, Langmoen IA. L-alpha-aminoadipate reduces glutamate release from brain tissue exposed to combined oxygen and glucose deprivation. *J Cereb Blood Flow Metab*. 1997; 17(5):567–70. <https://doi.org/10.1097/00004647-199705000-00011> PMID: 9183295.
  96. De Filippo C, Cavalieri D, Di Paola M, Ramazzotti M, Poullet JB, Massart S, et al. Impact of diet in shaping gut microbiota revealed by a comparative study in children from Europe and rural Africa. *Proc Natl Acad Sci U S A*. 2010; 107(33):14691–6. Epub 20100802. <https://doi.org/10.1073/pnas.1005963107> PMID: 20679230; PubMed Central PMCID: PMC2930426.
  97. Rizzatti G, Lopetuso LR, Gibiino G, Binda C, Gasbarrini A. Proteobacteria: A Common Factor in Human Diseases. *Biomed Res Int*. 2017; 2017:9351507. Epub 20171102. <https://doi.org/10.1155/2017/9351507> PMID: 29230419; PubMed Central PMCID: PMC5688358.
  98. Peter J, Fournier C, Durdevic M, Knoblich L, Keip B, Dejacó C, et al. A Microbial Signature of Psychological Distress in Irritable Bowel Syndrome. *Psychosom Med*. 2018; 80(8):698–709. <https://doi.org/10.1097/PSY.0000000000000630> PMID: 30095672; PubMed Central PMCID: PMC6250280.
  99. Li M, Wang B, Zhang M, Rantalainen M, Wang S, Zhou H, et al. Symbiotic gut microbes modulate human metabolic phenotypes. *Proc Natl Acad Sci U S A*. 2008; 105(6):2117–22. Epub 20080205. <https://doi.org/10.1073/pnas.0712038105> PMID: 18252821; PubMed Central PMCID: PMC2538887.
  100. McLean CP, Asnaani A, Litz BT, Hofmann SG. Gender differences in anxiety disorders: prevalence, course of illness, comorbidity and burden of illness. *J Psychiatr Res*. 2011; 45(8):1027–35. Epub 20110325. <https://doi.org/10.1016/j.jpsychires.2011.03.006> PMID: 21439576; PubMed Central PMCID: PMC3135672.
